# Supplementary material for: The Epigenetic Legacy of Maternal Protein Restriction: Renal Ptger1 DNA Methylation Changes in Hypertensive Rat Offspring
Source: MDPI journal article supplement (doi:10.3390/nu15183957), 2023-09-13
Supplement: s1 [file s1]

### Supplemental Table S1

**Composition of prenatal diet.** \* AIN-76 prescription (Oriental Yeast Co., Ltd., Tokyo, Japan).  
mCN: maternal control diet; mLP: maternal low-protein diet.

| Component (% w/w) | mCN (20% Casein) | mLP (9% Casein) |
|-------------------|------------------|-----------------|
| Casein            | 20.0             | 9.0             |
| Corn starch       | 66.8             | 77.8            |
| DL-Methionine     | 0.2              | 0.2             |
| Soybean oil       | 5.0              | 5.0             |
| Vitamin mixture*  | 1.0              | 1.0             |
| Mineral mixture*  | 4.0              | 4.0             |
| Cellulose powder  | 3.0              | 3.0             |

**Supplemental Table S2**

**Composition of low and high protein diets in offspring.** \* AIN-76 prescription (Oriental Yeast Co., Ltd., Tokyo, Japan). CN: control diet; LP: low-protein diet; HP: high-protein diet.

| <b>Component (% w/w)</b> | <b>CN (20% Casein)</b> | <b>LP (9% Casein)</b> | <b>HP (40% Casein)</b> |
|--------------------------|------------------------|-----------------------|------------------------|
| Casein                   | 20.0                   | 9.0                   | 40.0                   |
| Corn starch              | 66.8                   | 77.8                  | 46.8                   |
| DL-Methionine            | 0.2                    | 0.2                   | 0.2                    |
| Soybean oil              | 5.0                    | 5.0                   | 5.0                    |
| Vitamin mixture*         | 1.0                    | 1.0                   | 1.0                    |
| Mineral mixture*         | 4.0                    | 4.0                   | 4.0                    |
| Cellulose powder         | 3.0                    | 3.0                   | 3.0                    |

### Supplemental Table S3

Statistical summary of methylome sequencing and the average methylation level of CN/LP group.

|                                               | CN            | LP            |
|-----------------------------------------------|---------------|---------------|
| <b>Read Number</b>                            | <b>754.6M</b> | <b>525.5M</b> |
| <b>Rate of Uniquely Mapped Reads</b>          | <b>80.1%</b>  | <b>80.7%</b>  |
| <b>Rate of Reads Mapped on Multiple Sites</b> | <b>6.5%</b>   | <b>6.6%</b>   |
| <b>Rate of Reads Unmapped</b>                 | <b>13.4%</b>  | <b>12.8%</b>  |
| <b>Average Read Depth</b>                     | <b>CN</b>     | <b>LP</b>     |
| <b>All Nucleotides</b>                        | <b>24.9x</b>  | <b>22.9x</b>  |
| <b>All Cytosines</b>                          | <b>27.0x</b>  | <b>25.0x</b>  |
| <b>CpG sites</b>                              | <b>29.6x</b>  | <b>26.6x</b>  |
| <b>Average Methylation Level</b>              | <b>CN</b>     | <b>LP</b>     |
| <b>All Cytosines</b>                          | <b>4.6%</b>   | <b>4.5%</b>   |
| <b>CpG sites</b>                              | <b>70.0%</b>  | <b>70.0%</b>  |
| <b>CHG sites</b>                              | <b>1.3%</b>   | <b>1.2%</b>   |
| <b>CHH sites</b>                              | <b>1.3%</b>   | <b>1.2%</b>   |

## Supplemental Table S4

**Primer sequences for each gene. a-b** Primer sequences used for real-time PCR of (a) candidate genes narrowed by integrating data from both methylome and transcriptome profiling and (b) The seven genes closely associated with kidney disease that fluctuated only in the methylome analysis. (c) Primer sequences used for the bisulfite sequencing. The number of CpGs evaluated as well as the regions that were assessed when the transcription start site (TSS) was set to +1.

**a**

| Target gene                                               | Primer Sequence (5' to 3')                                        |
|-----------------------------------------------------------|-------------------------------------------------------------------|
| <i>Gnas</i><br>(GNAS complex locus)                       | Forward : AGCAGGGCAAACGAGAAGA<br>Reverse : ATGCACACCGAGAGAGATGG   |
| <i>Ptger1</i><br>(prostaglandin E receptor 1 subtype EP1) | Forward : AGTAGCTGGAGTGGGAGCA<br>Reverse : GCTCATATCAGTGGCCAAGAGG |
| <i>Runx1</i><br>(runt-related transcription factor 1)     | Forward : GAGGCCAACAGGAGGAAAC<br>Reverse : CACCCGGAACCGAAAACA     |
| <i>Tbx3</i><br>(T-box 3)                                  | Forward : GGAGGAAGTGGGGTGAAAGG<br>Reverse : GTCCAACAGGCACACGAAAG  |
| <i>Actb</i><br>(beta-actin)                               | Rat Housekeeping Gene Primer Set, Rat Actb primer                 |

**b**

| Target gene                                                         | Primer Sequence (5' to 3')                                       |
|---------------------------------------------------------------------|------------------------------------------------------------------|
| <i>Aggf1</i><br>(angiogenic factor with G patch and FHA domains 1)  | Forward : GACTCGCAGAGTGAGTGAG<br>Reverse : GCACAGTGTGTCCATGTCC   |
| <i>Cyp24a1</i><br>(cytochrome P450 family 24 subfamily a member 1)  | Forward : CAAACCTGCATCGACAACC<br>Reverse : CCGAATGGGAGATGAGCGAA  |
| <i>Fat4</i><br>(FAT atypical cadherin 4)                            | Forward : TGTACAGCCAAACCGAGTCA<br>Reverse : TGACCAGAAGTCCACACAGG |
| <i>Lhx1</i><br>(LIM homeobox 1)                                     | Forward : ACTGGAGACGTTGAAGGCAG<br>Reverse : AAAGACCTCCGACACATGG  |
| <i>Pdgfra</i><br>(platelet-derived growth factor alpha polypeptide) | Forward : ACAAACCTGAGAGCCCATGG<br>Reverse : CGCACATTGGCAATGAAGCA |
| <i>Ryr1</i><br>(ryanodine receptor 1)                               | Forward : TGAATACAACGCTGCTCTG<br>Reverse : GCATAGGCAGTGTGATCTCG  |
| <i>Sema5b</i><br>(semaphorin 5B)                                    | Forward : AGGTGCTCGGCTACCTTAG<br>Reverse : CAAGAACCCGAGTTGTCTCC  |

**c**

| Name                       | Position                    | Number of CpGs analyzed | Primer Sequence (5' to 3')                                                              |
|----------------------------|-----------------------------|-------------------------|-----------------------------------------------------------------------------------------|
| <i>Ptger1</i> CpG island ① | + 654 ~ + 953<br>(300 bp)   | 23 CpGs                 | Sense primer: AATATATTTGGTGTGTTAATAGG<br>Antisense primer: ACCAAAAAACCATACAACC          |
| <i>Ptger1</i> CpG island ② | + 939 ~ + 1153<br>(215 bp)  | 18 CpGs                 | Sense primer: ATGGTTTTTTTGGTTTGTGTTAT<br>Antisense primer: CACCAATACCAAAATACTATAACTC    |
| <i>Ptger1</i> CpG island ③ | + 1158 ~ + 1420<br>(263 bp) | 28 CpGs                 | Sense primer: ATTAGTTTTGGGTTTTTGGAGG<br>Antisense primer: AAACAATAATAATAATAATAAC        |
| <i>Ptger1</i> promoter     | -318 ~ + 243<br>(561 bp)    | 10 CpGs                 | Sense primer: GTTTATGGTTTTTGTGTTAAGTTGTTA<br>Antisense primer: CTTTCAAAAATCTCTTAACCTACC |

## Supplemental Table S5

Primer sequences for the genes (*Slc14a2*, *Il1b*, *Corin*, *Hmox1*, *Gucy1b3*, and *Gdnf*) extracted in transcriptome analysis.

| Target gene                                                               | Primer Sequence (5' to 3')                                                |
|---------------------------------------------------------------------------|---------------------------------------------------------------------------|
| <b>Slc14a2</b><br>(solute carrier family 14 (urea transporter), member 2) | Forward : TGAATGGCTCTCAGAGGAG<br>Reverse : ACGTTTGCTTACACTATGATTGGA       |
| <b>Il1b</b><br>(interleukin 1 beta)                                       | Forward : TCAAGCAGAGCACAGACCTG<br>Reverse : AGAACTCAGTGCTGGCTGTG          |
| <b>Corin</b><br>(corin, serine peptidase)                                 | Forward : CCTAATTTAATTAGCCAGACATCAACG<br>Reverse : CAAAACCAACCGACGGTCTTAA |
| <b>Hmox1</b><br>(heme oxygenase 1)                                        | Forward : CAGGGGAGAATCTTGCCTGG<br>Reverse : TACCACCCACCCCTCAAAG           |
| <b>Gucy1b3</b><br>(guanylate cyclase 1, soluble, beta 3)                  | Forward : GTGGGCTTCAACGCTTTCTG<br>Reverse : CCACAAAGGCTGCCATTGAG          |
| <b>Gdnf</b><br>(glial cell derived neurotrophic factor)                   | Forward : ATGTAGTCCCAGACCCTCCG<br>Reverse : CTTACTGTGGCAGACGCTCA          |

# Supplemental Table S6

**Pregnancy-related changes in maternal body weight and feed intake, and the body weight and kidney weight of pups. a** Changes in maternal body weight, weight gain, and feed intake during pregnancy. **b** Body weight and kidney weight at D5, D10, and D28 of postnatal rat. Data are expressed as means  $\pm$  standard error. Sample sizes for (a) were  $n = 6-7$ , and for (b) were  $n = 5$  rats per group.  $*p < 0.05$  vs. the D10-CN group according to a Student's  $t$ -test.

**a**

| Type of record                   | Groups            |                   |
|----------------------------------|-------------------|-------------------|
| Gestational period               | CN                | LP                |
| 1st day pregnancy weight (g)     | 175.13 $\pm$ 2.62 | 168.42 $\pm$ 3.60 |
| 21st day pregnancy weight (g)    | 261.50 $\pm$ 4.87 | 251.40 $\pm$ 7.08 |
| Weight gain during pregnancy (g) | 86.38 $\pm$ 3.80  | 82.98 $\pm$ 4.06  |
| Feed intake (g/day)              | 14.73 $\pm$ 0.21  | 14.96 $\pm$ 0.26  |

**b**

| Type of record      | Groups             |                     |
|---------------------|--------------------|---------------------|
| 5 day old rat pups  | D5-CN              | D5-LP               |
| Final weight (g)    | 7.48 $\pm$ 0.10    | 7.30 $\pm$ 0.15     |
| Kidney weight (mg)  | 83.32 $\pm$ 3.32   | 88.00 $\pm$ 5.82    |
| 10 day old rat pups | D10-CN             | D10-LP              |
| Final weight (g)    | 13.59 $\pm$ 0.46   | 14.15 $\pm$ 0.27    |
| Final weight (mg)   | 159.28 $\pm$ 3.50  | 173.62 $\pm$ 2.54 * |
| 28 day old rat pups | D28-CN             | D28-LP              |
| Final weight (g)    | 55.51 $\pm$ 0.23   | 57.33 $\pm$ 0.72    |
| Final weight (mg)   | 569.66 $\pm$ 29.99 | 611.98 $\pm$ 18.85  |

## Supplemental Table S7

**Statistical data for six genes that fluctuate in both methylome and transcriptome analyses.**

**a** The location and number of fluctuating CpG sites extracted in methylome analysis. **b** Fold changes in gene expression obtained from transcriptome analysis.

**a**

| Chr     | Gene    | Gene name                                | Position of CpG analyzed | Number of CpGs analyzed | Number of hypermethylated CpGs in D28-LP | Number of hypomethylated CpGs in D28-LP |
|---------|---------|------------------------------------------|--------------------------|-------------------------|------------------------------------------|-----------------------------------------|
| Chr. 3  | Gnas    | GNAS complex locus                       | intragenic               | 148                     | 36                                       | 112                                     |
| Chr. 7  | Kank3   | KN motif and ankyrin repeat domains 3    | intragenic               | 147                     | 46                                       | 101                                     |
| Chr. 11 | Runx1   | runt-related transcription factor 1      | intragenic               | 98                      | 45                                       | 53                                      |
| Chr. 12 | Tbx3    | T-box 3                                  | intragenic               | 88                      | 31                                       | 57                                      |
| Chr. 17 | Proser2 | proline and serine rich 2                | intragenic               | 118                     | 38                                       | 80                                      |
| Chr. 19 | Ptger1  | prostaglandin E receptor 1 (subtype EP1) | intragenic               | 156                     | 114                                      | 42                                      |

**b**

| Gene    | Gene name                                | ID           | Fold change (LP/CN) |
|---------|------------------------------------------|--------------|---------------------|
| Gnas    | GNAS complex locus                       | 1387906_a_at | 1.24                |
|         |                                          | 1390263_at   | 1.29                |
| Kank3   | KN motif and ankyrin repeat domains 3    | 1373483_at   | 1.25                |
| Runx1   | runt-related transcription factor 1      | 1368914_at   | 1.24                |
| Tbx3    | T-box 3                                  | 1390627_a_at | 1.25                |
|         |                                          | 1393160_at   | 1.68                |
|         |                                          | 1379057_at   | 1.38                |
| Proser2 | proline and serine rich 2                | 1385668_at   | 1.33                |
|         |                                          | 1379057_at   | 1.38                |
|         |                                          | 1385668_at   | 1.33                |
| Ptger1  | prostaglandin E receptor 1 (subtype EP1) | 1369254_a_at | 1.49                |

## Supplemental Table S8

The genes that fluctuate in the kidneys of SHRSP pups (D28) exposed to a fetal low-protein diet. The expression of seven genes (*Aggf1*, *Cyp24a1*, *Fat4*, *Lhx1*, *Pdgfa*, *Ryr1*, and *Sema5b*) closely associated with kidney disease, which fluctuated only in methylome analysis, were analyzed by transcriptome analysis and real-time PCR. Data are expressed as means  $\pm$  standard error ( $n = 5$ ). N/A, Not Applicable. CN and LP, offspring CN/LP diet.

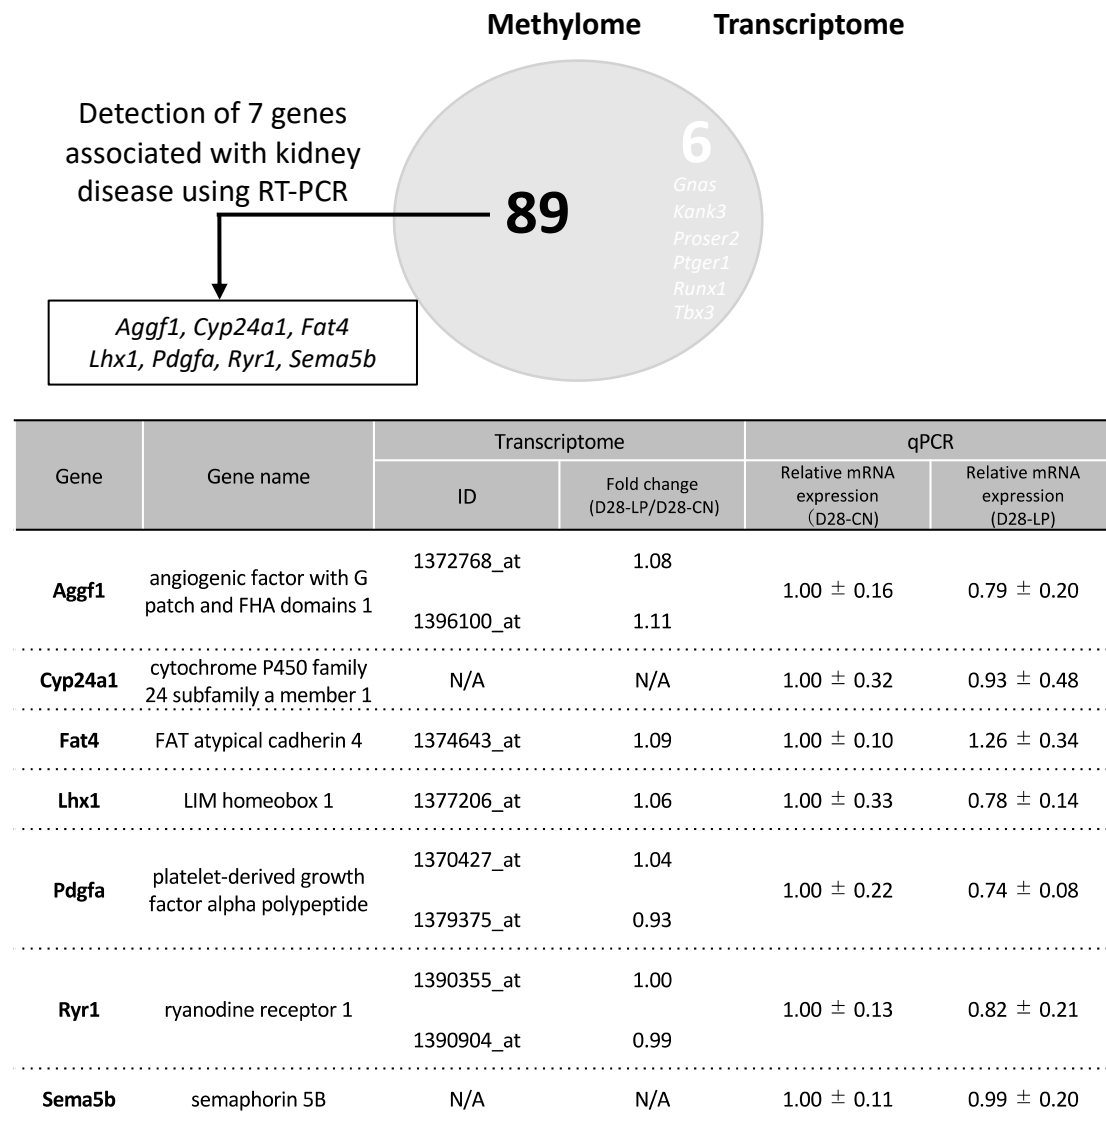



# Supplemental Table S9

Relative ratios (Fold-change) of kidney disease-related genes extracted in transcriptome analysis from D5 to D28 over time in pup kidneys.

| Gene                    | Gene name                                                              | ID           | Fold-change(D5) | Fold-change(D10) | Fold-change(D28) |
|-------------------------|------------------------------------------------------------------------|--------------|-----------------|------------------|------------------|
| Increase (Continuation) |                                                                        |              |                 |                  |                  |
| Slc14a2                 | solute carrier family 14 (urea transporter), member 2                  | 1387550_a_at | 1.24            | 1.45             | 1.33             |
| Decrease (Continuation) |                                                                        |              |                 |                  |                  |
| Il1b                    | interleukin 1 beta                                                     | 1398256_at   | 0.68            | 0.68             | 0.78             |
| Increase (Cancel)       |                                                                        |              |                 |                  |                  |
| Bmpr2                   | bone morphogenetic protein receptor, type II (serine/threonine kinase) | 1376843_at   | 1.25            | 1.03             | 1.10             |
| Cdkn1c                  | cyclin-dependent kinase inhibitor 1C                                   | 1372299_at   | 1.27            | 1.00             | 1.19             |
| Corin                   | corin, serine peptidase                                                | 1382954_at   | 1.53            | 0.97             | 1.02             |
| Cryab                   | crystallin, alpha B                                                    | 1370026_at   | 1.35            | 1.02             | 1.14             |
| Hba1 /// Hba2           | hemoglobin, alpha 1 /// hemoglobin, alpha 2                            | 1388608_x_at | 1.27            | 1.20             | 1.03             |
| Hmox1                   | heme oxygenase 1                                                       | 1370080_at   | 1.34            | 0.85             | 1.09             |
| Myh11                   | myosin, heavy chain 11, smooth muscle                                  | 1370896_a_at | 1.29            | 1.45             | 1.02             |
| Decrease (Cancel)       |                                                                        |              |                 |                  |                  |
| Apob                    | apolipoprotein B                                                       | 1388190_at   | 0.63            | 1.13             | 0.90             |
| Gdnf                    | glial cell derived neurotrophic factor                                 | 1385180_at   | 0.76            | 0.95             | 0.86             |
| Gucy1b3                 | guanylate cyclase 1, soluble, beta 3                                   | 1374389_at   | 0.73            | 0.86             | 0.89             |

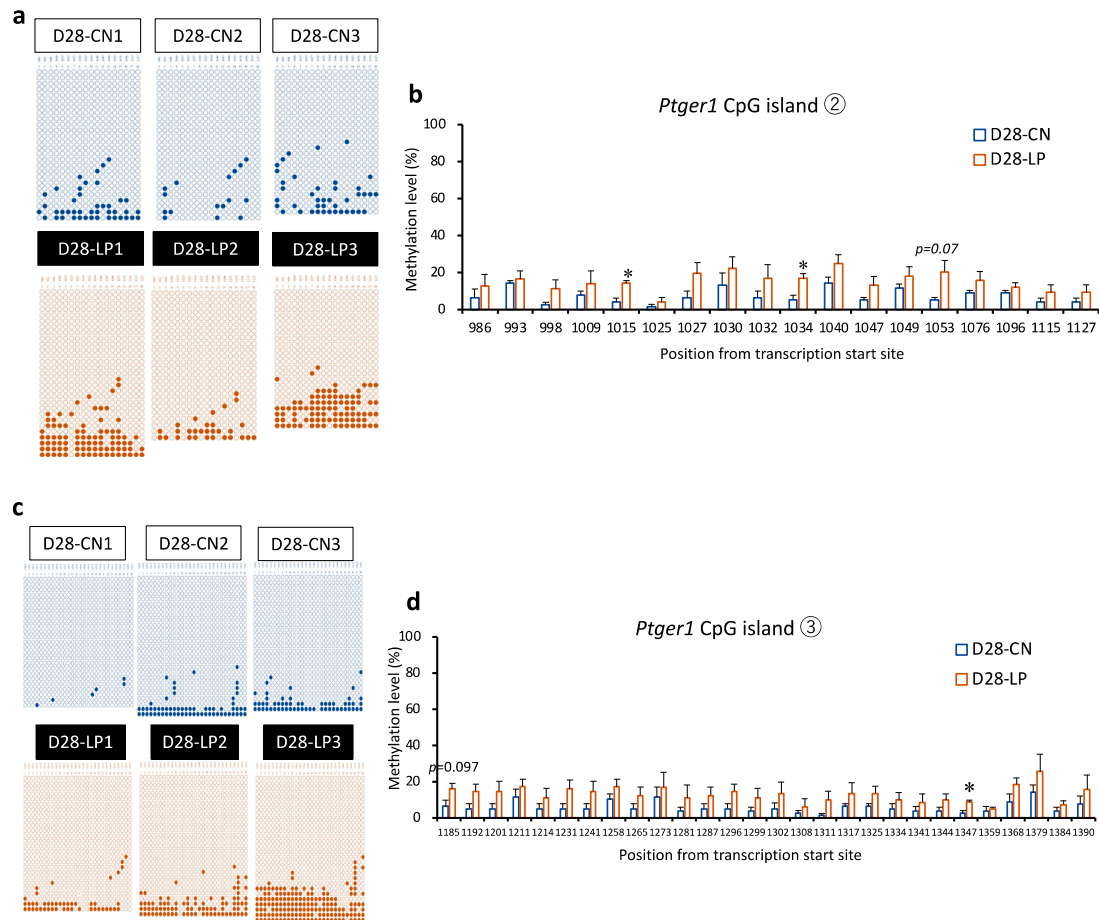

**Supplemental Figure S1**

***Ptger1* CpG island (CpG② and CpG③) DNA methylation levels in pup (D28) kidneys of fetal exposure to maternal low protein diet.** **a** Bisulfite sequencing analysis of the *Ptger1* CpG island ②. **b** DNA methylation levels of each CpG site in the *Ptger1* CpG island ② were calculated using the methylation data shown in (a). **c** Bisulfite sequencing analysis of the *Ptger1* CpG island ③. **d** DNA methylation levels of each CpG site in the *Ptger1* CpG island ③ were calculated using the methylation data shown in (c). The horizontal axis shows each evaluated CpG site. ○, unmethylated cytosine; ●, methylated cytosine. Data are expressed as means ± standard error ( $n = 3$ ). \* $p < 0.05$  vs. the D28-CN group according to a Student's t-test. *Ptger1*, Prostaglandin E Receptor 1. CpG, 5'-C-phosphate-G-3'.

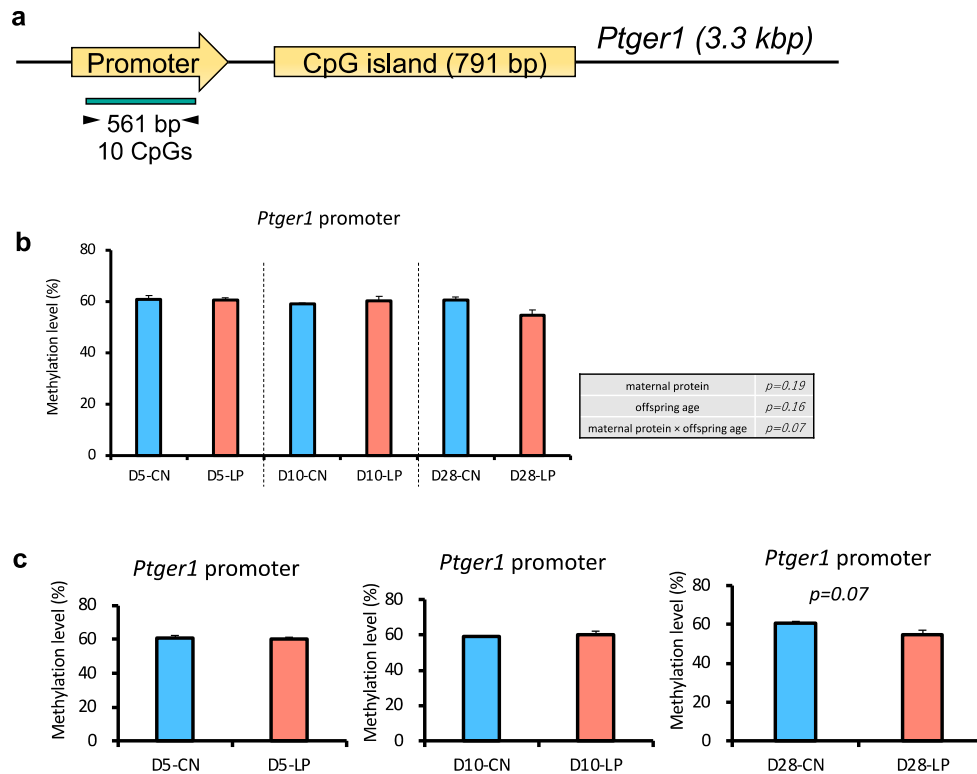

**Supplemental Figure S2**

***Ptger1* promoter DNA methylation levels from D5 to D28 in pup kidneys exposed to a fetal low-protein diet.** **a** Cartoon showing the evaluated *Ptger1* promoter region. Primers were designed in the region around the TSS (-318 bp to + 243 bp). **b** DNA methylation levels of the *Ptger1* promoter over time in pup kidneys from D5 to D28 according to maternal diet and offspring age. **c** DNA methylation levels of the *Ptger1* promoter at D5, D10, and D28 according to maternal diet. Data are expressed as means  $\pm$  standard error ( $n = 5$ ). Statistical analysis was performed using Tukey's test (**b**) and Student's *t*-test (**c**).

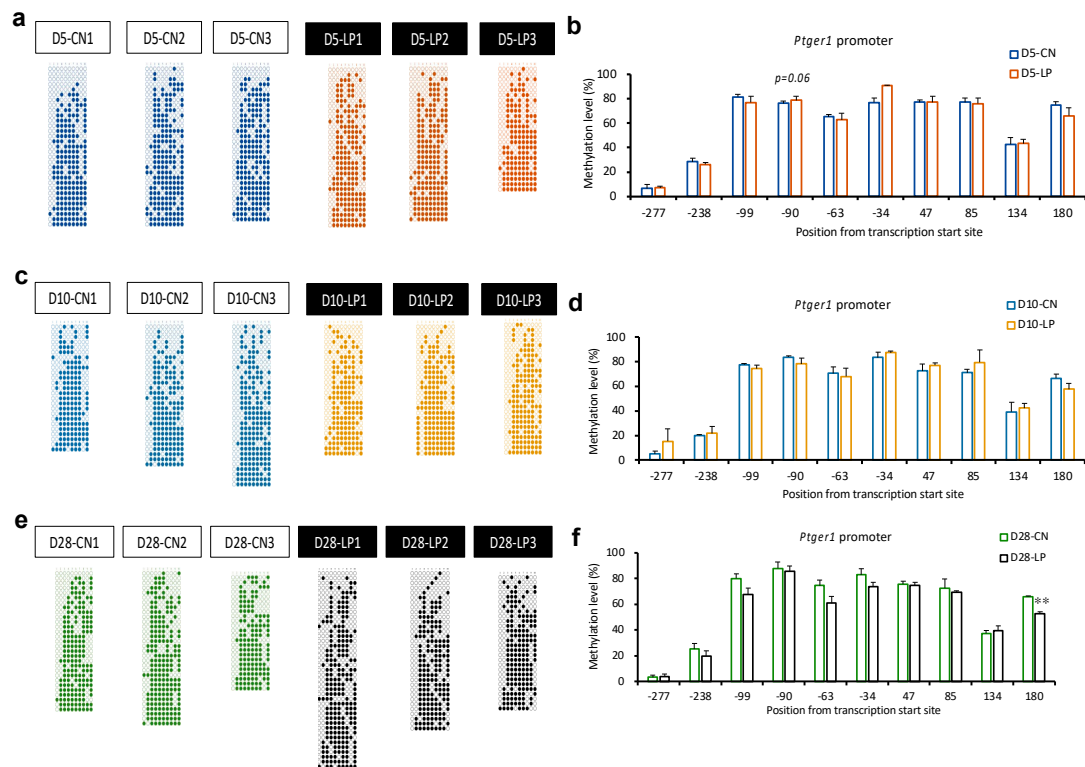

### Supplemental Figure S3

***Ptger1* promoter DNA methylation levels from D5 to D28 in pup kidneys exposed to a fetal low-protein diet. a, c, and e** Bisulfite sequencing analysis of *Ptger1* promoter in D5, D10 and D28. The horizontal axis shows each evaluated CpG site. ○, Unmethylated cytosine; ●, methylated cytosine. **b, d, and f** DNA methylation levels at each CpG site in *Ptger1* promoter were calculated from the bisulfite sequencing data shown in (a), (c) and (e), respectively. Data are expressed as means  $\pm$  standard error ( $n = 5$ ). \*\* $p < 0.01$  vs. the D28-CN group according to a Student's *t*-test.

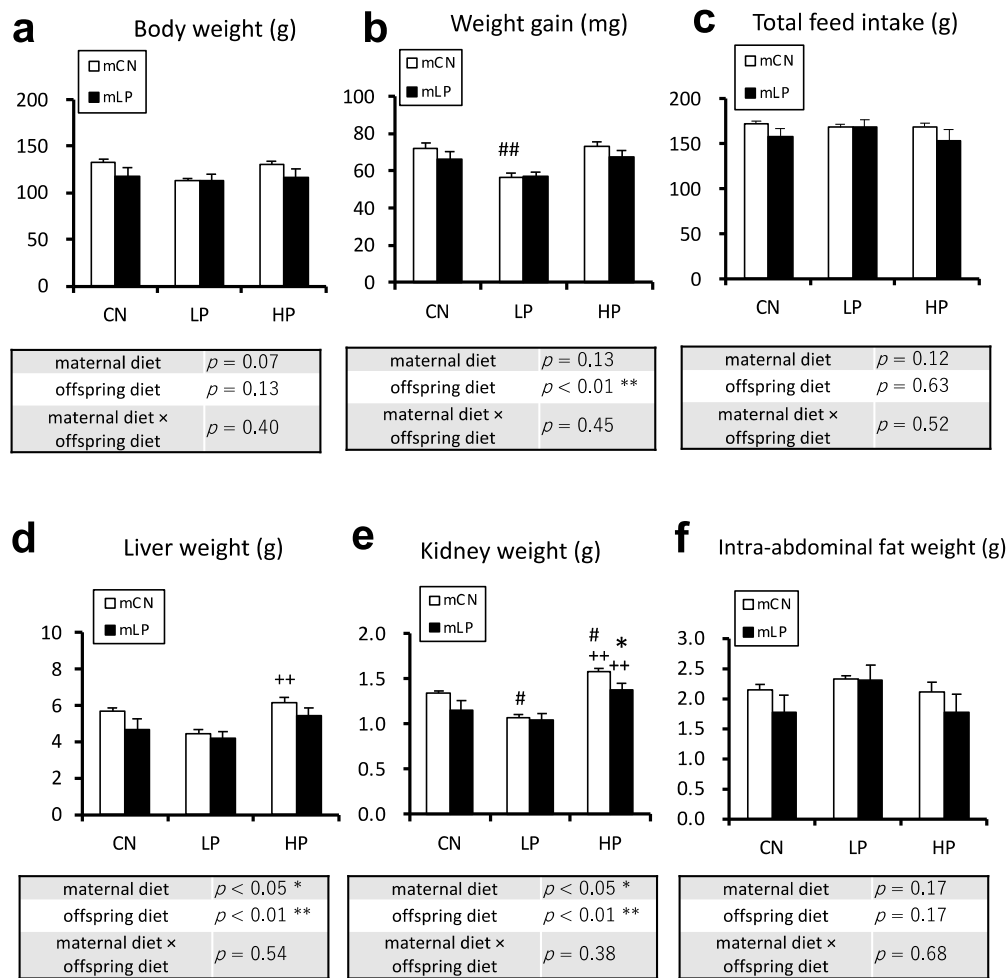

**Supplemental Figure S4**

**Body weight, feed intake, and tissue weight either on a low-protein diet or a high-protein diet for 2 weeks after weaning (at week 4).** **a** Body weight of adult offspring (D42) in each group. **b-c** The graphs illustrate the weight gain (**b**) or total feed intake (**c**) from the age of 4 to 6 weeks during the low-protein or high-protein diet trials. **d-f** The graphs illustrate the liver weight (**d**), kidney weight (**e**) and intra-abdominal fat weight (**f**) (total weight of mesenteric fat, retroperitoneal fat, and peritesticular fat) in 6-week-old offspring of each group. Data are expressed as means  $\pm$  standard error ( $n = 5$ ).  $^{*}p < 0.05$  vs. corresponding mCN group;  $^{**}p < 0.01$ ,  $^{#}p < 0.05$  vs. corresponding CN group;  $^{++}p < 0.01$  vs. corresponding LP group. Statistical analysis was performed using two-way analysis of variance followed by Tukey's test. mCN/mLP: maternal control diet/maternal low protein diet; CN/LP/HP: offspring CN/LP/HP diet.
